# Supplementary material for: A National Study of Life-Sustaining Treatments in South Korea: What Factors Affect Decision-Making?
Source: PubMed Central journal article supplement — Cancer Res Treat. 2020 Nov 21;53(2):593–600. doi: 10.4143/crt.2020.803 (PMC8053857; doi:10.4143/crt.2020.803), 2020-11-21
Supplement: crt-2020-803_S1Table.pdf [file crt-2020-803_S1Table.pdf]

**S1 Table.** Comparison of differences in demographic characteristics related to self-determination of life-sustaining treatment

| Item                                 | Total         | Self-determination patients | Non-self-determination patients | p-value |
|--------------------------------------|---------------|-----------------------------|---------------------------------|---------|
| Sex                                  | 71,327 (100)  | 23,891 (100)                | 47,436 (100)                    | < 0.001 |
| Male                                 | 42,909 (60.2) | 15,062 (63.0)               | 27,847 (58.7)                   |         |
| Female                               | 28,418 (39.8) | 8,829 (37.0)                | 19,589 (41.3)                   |         |
| Age (yr)                             | 71,327 (100)  | 23,891 (100)                | 47,436 (100)                    | < 0.001 |
| < 30                                 | 607 (0.9)     | 81 (0.3)                    | 526 (1.1)                       |         |
| 30-39                                | 1,033 (1.4)   | 430 (1.8)                   | 603 (1.3)                       |         |
| 40-49                                | 3,461 (4.9)   | 1,717 (7.2)                 | 1,744 (3.7)                     |         |
| 50-59                                | 9,261 (13.0)  | 4,597 (19.2)                | 4,664 (9.8)                     |         |
| 60-69                                | 14,779 (20.7) | 6,292 (26.3)                | 8,487 (17.9)                    |         |
| 70-79                                | 21,018 (29.5) | 6,681 (28.0)                | 14,337 (30.2)                   |         |
| ≥ 80                                 | 21,168 (29.7) | 4,093 (17.1)                | 17,075 (36.0)                   |         |
| Insurance premium level              | 71,327 (100)  | 23,891 (100)                | 47,436 (100)                    | < 0.001 |
| Medical aid                          | 6,907 (9.7)   | 2,643 (11.1)                | 4,264 (9.0)                     |         |
| 1-4 percentile                       | 9,943 (13.9)  | 3,417 (14.3)                | 6,526 (13.8)                    |         |
| 5-8 percentile                       | 8,034 (11.3)  | 2,962 (12.4)                | 5,072 (10.7)                    |         |
| 9-12 percentile                      | 10,090 (14.1) | 3,568 (14.9)                | 6,522 (13.7)                    |         |
| 13-16 percentile                     | 13,517 (19.0) | 4,546 (19.0)                | 8,971 (18.9)                    |         |
| 17-20 percentile                     | 22,836 (32.0) | 6,755 (28.3)                | 16,081 (33.9)                   |         |
| Disability                           | 71,327 (100)  | 23,891 (100)                | 47,436 (100)                    | < 0.001 |
| No                                   | 55,082 (77.2) | 19,917 (83.4)               | 35,165 (74.1)                   |         |
| Yes                                  | 16,245 (22.8) | 3,974 (16.6)                | 12,271 (25.9)                   |         |
| Residence in national capital region | 71,327 (100)  | 23,891 (100)                | 47,436 (100)                    | < 0.001 |
| Yes                                  | 37,985 (53.3) | 13,361 (55.9)               | 24,624 (51.9)                   |         |
| No                                   | 33,342 (46.7) | 10,530 (44.1)               | 22,812 (48.1)                   |         |
| CCI Score                            | 71,327 (100)  | 23,891 (100)                | 47,436 (100)                    | < 0.001 |
| 0                                    | 18,267 (25.6) | 5,739 (24.0)                | 12,528 (26.4)                   |         |
| 1                                    | 14,268 (20.0) | 3,376 (14.1)                | 10,892 (23.0)                   |         |
| 2                                    | 17,512 (24.6) | 6,828 (28.6)                | 10,684 (22.5)                   |         |
| ≥ 3                                  | 21,280 (29.8) | 7,948 (33.3)                | 13,332 (28.1)                   |         |
| History of hospitalization           | 71,327 (100)  | 23,891 (100)                | 47,436 (100)                    | < 0.001 |
| No                                   | 34,446 (48.3) | 10,607 (44.4)               | 23,839 (50.3)                   |         |
| Yes                                  | 36,881 (51.7) | 13,284 (55.6)               | 23,597 (49.7)                   |         |

CCI, Charlson comorbidity index
